# Supplementary material for: Realizing cost-effective ZnO:Sr nanoparticles@graphene nanospreads for improved photocatalytic and antibacterial activities
Source: Royal Society of Chemistry journal article supplement (doi:10.1039/c6ra08697g), 2016-01-01
Supplement: c6ra08697g1.pdf [file c6ra08697g1.pdf]

## **Realizing cost-effective ZnO:Sr nanoparticles@graphene nanospreads for improved photocatalytic and antibacterial activities**

**K. Ravichandran<sup>a,\*</sup>, N. Chidhambaram<sup>a,b</sup>, T. Arun<sup>c</sup>, S. Velmathi<sup>d</sup> and S. Gobalakrishnan<sup>e</sup>**

<sup>a</sup> Post Graduate & Research Department of Physics, AVVM Sri Pushpam College (Autonomous), Poondi, Thanjavur - 613 503, Tamil Nadu, India

<sup>b</sup> Post Graduate & Research Department of Physics, Rajah Serfoji Government College (Autonomous), Thanjavur - 613 005, Tamil Nadu, India

<sup>c</sup> Institute of Physics, Bhubaneswar, 751 005, India.

<sup>d</sup> Department of Chemistry, National Institute of Technology, Tiruchirappalli – 620 015, Tamil Nadu, India

<sup>e</sup> Department of Nanotechnology, Noorul Islam Centre for Higher Education, Noorul Islam University, Kumaracoil - 629 180, Tamil Nadu, India

\*Corresponding author:

Dr. K. Ravichandran,

Mobile: (+91)9443524180

Land line: 04362-278602

Fax : +91 4374 239328

E. mail: [kk1365@yahoo.com](mailto:kk1365@yahoo.com)

[kkravi1365@gmail.com](mailto:kkravi1365@gmail.com)

## S1. Photolysis of MB

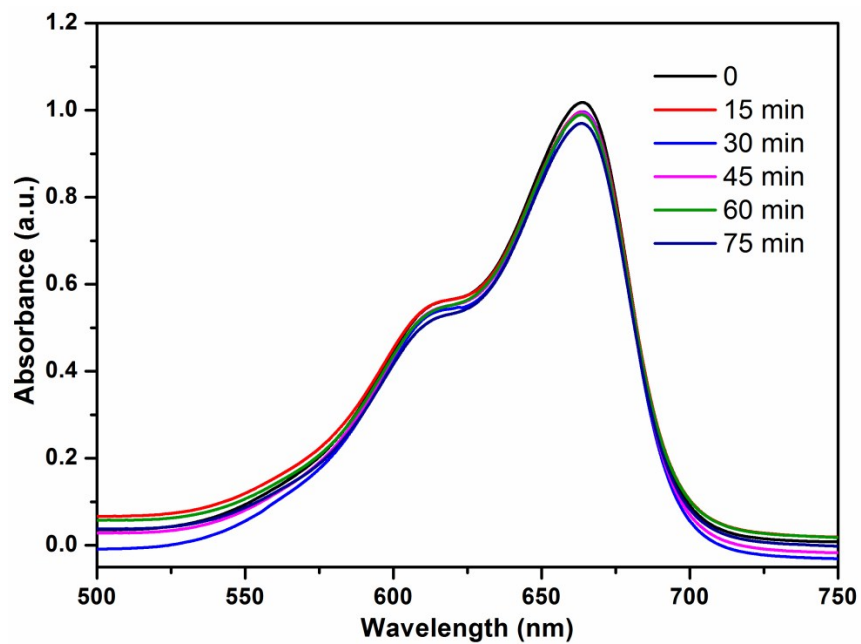

Fig. S1. Absorption spectra of MB solution under visible light irradiation.

Fig. S2. MB Photodegradation with graphene

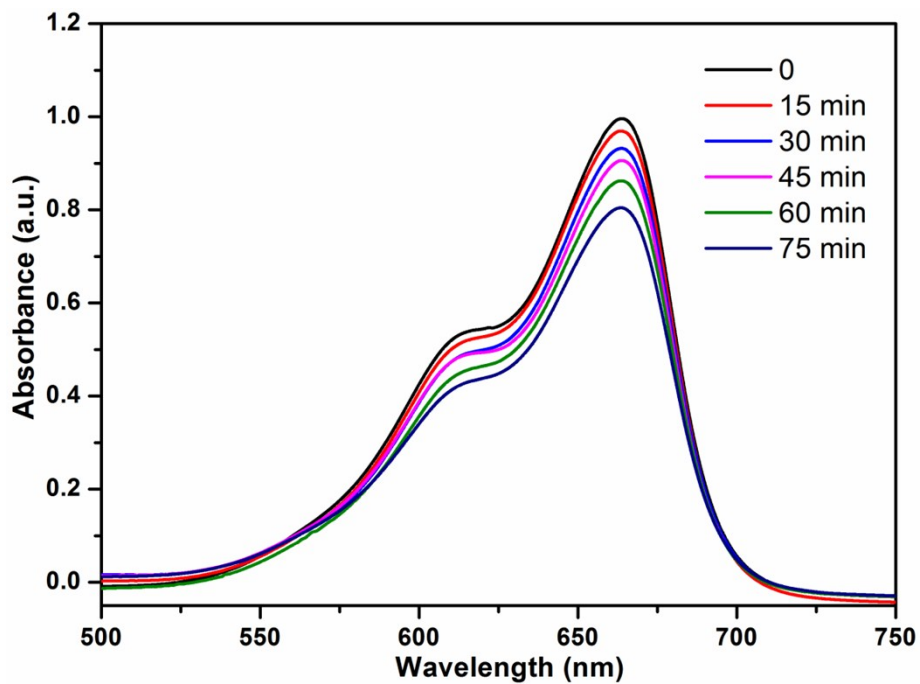

Fig. S2 (a). Absorption spectra of MB solution in the presence of graphene.

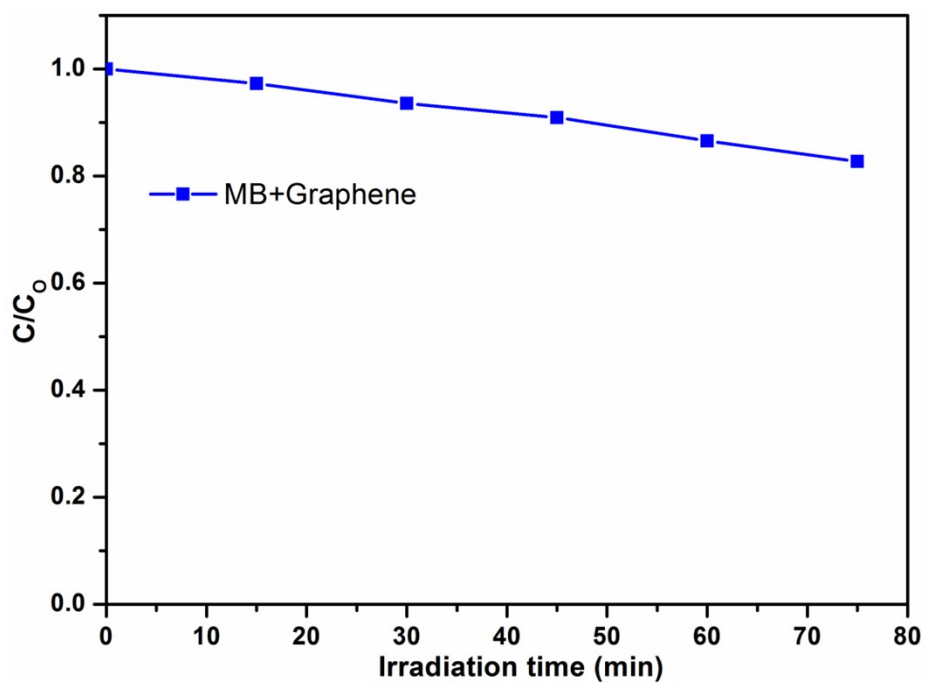

Fig. S2 (b). Photodegradation of MB in the presence of graphene.

### S3. Antibacterial studies

| Bacteria                     | Zone of Inhibition (diameter in mm) |    |     |        |          |
|------------------------------|-------------------------------------|----|-----|--------|----------|
|                              | Control                             | S* | ZnO | ZnO:Sr | ZnO:Sr/G |
| <i>Bacillus subtilis</i>     | -                                   | 19 | 16  | 16     | 17       |
| <i>Staphylococcus aureus</i> | -                                   | 15 | 11  | 14     | 15       |
| <i>Escherichia coli</i>      | -                                   | 25 | 19  | 23     | 25       |
| <i>Klebsiella pneumoniae</i> | -                                   | 17 | 17  | 25     | 26       |

\*Gentamicin

Table S1. Evaluation of disc diffusion assay values
